# Supplementary material for: Room-Temperature Superparamagnetic FeCu Nanoalloys: Insights into Magnetic Behavior from Synthesis and Simulation
Source: Research Square preprint supplement (doi:10.21203/rs.3.rs-6141115/v1), 2025-03-27
Supplement: Supplementary file 1 [file 1d6807e8d9654e1cc514bc3b.docx]

***Supporting Information***

Room-Temperature Superparamagnetic FeCu Nanoalloys: Magnetic Behavior Insights from Synthesis and Simulation

Maryam Bahrami, Mehrangiz Bahrami, S. Jafar Hoseini, Mohammad Hadi Ghatee*

(*Department of Chemistry, Shiraz University, Shiraz, 71946, Iran*)

Email: [mhghatee@shirazu.ac.ir](mailto:mhghatee@shirazu.ac.ir) ; [mhghatee2@gmail.com](mailto:mhghatee2@gmail.com)
Tel: +98 713 613 7174, Fax: +98 713 646 0788

**(b)**

**(a)**

**(c)**

**Figure S1.** Comparison of RDF for (a) core⋯core, (b) core⋯shell, and (c) shell⋯shell atoms of different-sized FeCu NP at 300 K, simulated in the absence of an external magnetic field.

**(b)**

**Janus (25,35)**

**(c)**

**Janus (25,45)**

**Figure S2.** Comparison of RDF for core⋯core, core⋯shell, and shell⋯shell atoms of Janus FeCu nanoparticle of size (a) (25,25), (b) (25,35), and (c) (25,45) at 300 K simulated in the absence of external magnetic field.

**Figure S3**. The FeFe RDF of FeCu-CS(35,50) simulated in the absence and presence of an external magnetic field at 300 K.

**Figure S4**. Changes in the magnetic properties of Janus FeCu nanoparticles as a function of the Fe/Cu atomic, ratio in the absence and presence of different external magnetic fields.

**Table S1**. Different components of magnetization vector for FeCu nanoparticles calculated under (A) no field and high field (1000 Tesla), (B) mid field (10 to 800 T) at 300 K.

**(A)**

| **FeCu NP** | **Bext=0** | | | **Bext=1000 T** | | |
| --- | --- | --- | --- | --- | --- | --- |
| **Mag*x*** | **Mag*y*** | **Mag*z*** | **Mag*x*** | **Mag*y*** | **Mag*z*** |
| CS (25,30) | -0.0486 | 0.4978 | 0.0726 | 0.0000 | 0.0000 | 0.6386 |
| CS (25,40) | -0.0952 | 0.0284 | 0.0145 | 0.0000 | 0.0000 | 0.2444 |
| CS (25,50) | -0.0186 | 0.0346 | 0.0177 | 0.0000 | 0.0000 | 0.1208 |
| CS (30,45) | -0.0347 | -0.0482 | 0.1108 | 0.0000 | 0.0000 | 0.2934 |
| CS (35,50) | 0.0681 | 0.1143 | 0.1257 | 0.0000 | 0.0000 | 0.3461 |
| Janus (25,25) | -0.0474 | 0.0174 | -0.3333 | 0.0000 | 0.0000 | 0.4708 |
| Janus (25,35) | -0.0176 | 0.1224 | -0.0210 | 0.0000 | 0.0000 | 0.2505 |
| Janus (25,45) | 0.0229 | -0.0382 | -0.0407 | 0.0000 | 0.0000 | 0.1369 |

**(B)**

| **FeCu NP** | **Bext = 10 T** | | | **Bext = 50 T** | | | **Bext = 150 T** | | |
| --- | --- | --- | --- | --- | --- | --- | --- | --- | --- |
| **Magx** | **Magy** | **Magz** | **Magx** | **Magy** | **Magz** | **Magx** | **Magy** | **Magz** |
| CS (25,30) | 3.0E-05 | -4.3E-5 | 0.5212 | 2.27E-05 | -1.4E-05 | 0.549712 | 2.75E-06 | -2E-06 | 0.579794 |
| CS (25,40) | -1.9E-05 | 2.79E-07 | 0.1317 | 1.12E-06 | 5.46E-06 | 0.170794 | -5.35E-07 | -6.38E-07 | 0.202761 |
| CS (25,50) | 2.43E-05 | -3.4E-06 | 0.0485 | -1.08E-06 | 1.26E-06 | 0.067131 | 3.01E-07 | -2.19E-06 | 0.09079 |
| CS (30,45) | -1.9E-06 | 1.75E-05 | 0.165996 | 7E-06 | -8.8E-07 | 0.208452 | 1.38E-08 | 2.59E-06 | 0.244618 |
| CS (35,50) | 6.19E-06 | -6.7E-06 | 0.250919 | 5.14E-06 | 4.18E-06 | 0.281317 | -2.27E-06 | -3.63E-07 | 0.306107 |
| Janus (25,25) | 0.000109 | 3.95E-05 | 0.356217 | 1.94E-06 | 7.59E-06 | 0.389677 | 3.61E-06 | 1.40E-06 | 0.420081 |
| Janus (25,35) | 1.07E-05 | 5.2E-06 | 0.151843 | 4.66E-06 | 1.86E-05 | 0.182521 | 1.46E-05 | 2.16E-05 | 0.211305 |
| Janus (25,45) | 4.001E-06 | -2.8E-05 | 0.070924 | -5.6E-08 | 1.74E-06 | 0.089466 | 1.80E-06 | -1.14E-07 | 0.109684 |

| **FeCu NP** | **Bext = 350 T** | | | **Bext = 600 T** | | | **Bext = 800 T** | | |
| --- | --- | --- | --- | --- | --- | --- | --- | --- | --- |
| **Magx** | **Magy** | **Magz** | **Magx** | **Magy** | **Magz** | **Magx** | **Magy** | **Magz** |
| CS (25,30) | -3.6E-05 | 3.74E-05 | 0.607092 | 2.05E-06 | 1.45E-06 | 0.624036 | -6.09E-06 | -1.1E-05 | 0.632475 |
| CS (25,40) | 5.31E-06 | -1.18E-05 | 0.225385 | -6.01E-06 | 1.24E-05 | 0.23639 | -1.54E-06 | -1.48E-05 | 0.241193 |
| CS (25,50) | 1.98E-07 | -1.78E-06 | 0.108099 | 2.14E-06 | -2.37E-07 | 0.115743 | -2.07E-06 | 1.69E-06 | 0.118819 |
| CS (30,45) | -5.41E-06 | -1.12E-05 | 0.271361 | -9.58E-06 | 2.81E-06 | 0.28402 | -1.72E-06 | 7.52E-07 | 0.289635 |
| CS (35,50) | -9.04E-06 | -1.16E-05 | 0.325939 | -3.14E-06 | -3.22E-06 | 0.337129 | 3.35E-06 | -2.17E-06 | 0.342416 |
| Janus (25,25) | -3.57E-06 | -1.75E-05 | 0.444755 | 1.62E-06 | 9.15E-06 | 0.459088 | -2.83E-06 | 1.70E-06 | 0.465939 |
| Janus (25,35) | -6.41E-06 | -3.09E-06 | 0.232313 | 6.96E-06 | 1.68E-06 | 0.242728 | 4.30E-05 | 7.06E-07 | 0.247356 |
| Janus (25,45) | 1.87E-06 | 1.98E-06 | 0.12483 | 4.20E-06 | 4.96E-06 | 0.131926 | 1.61E-06 | -1.34E-06 | 0.134891 |


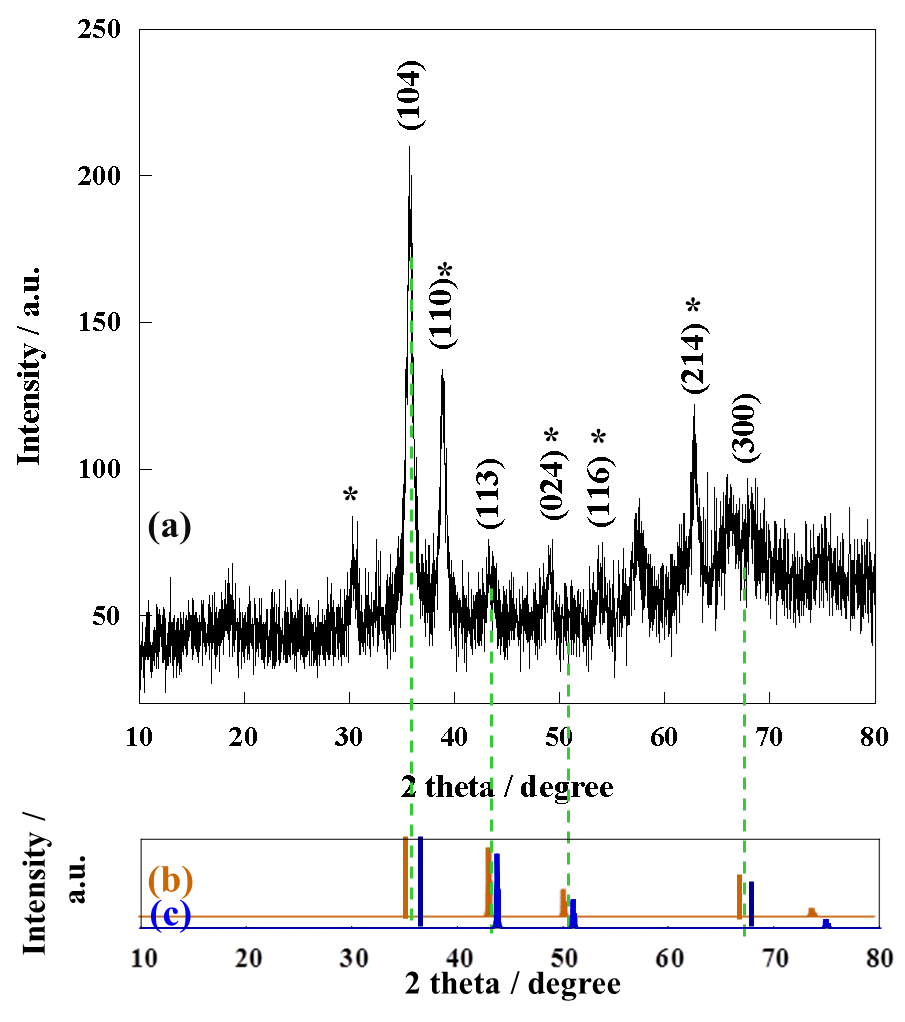


**Figure S5**. (a) XRD spectrum for the synthesized FeCu nanoparticles, (b) and (c) is the theoretical XRD analysis obtained from VESTA software (based on the experimental XRD pattern). These are standard for calibrations Cu(0) and Fe(0)


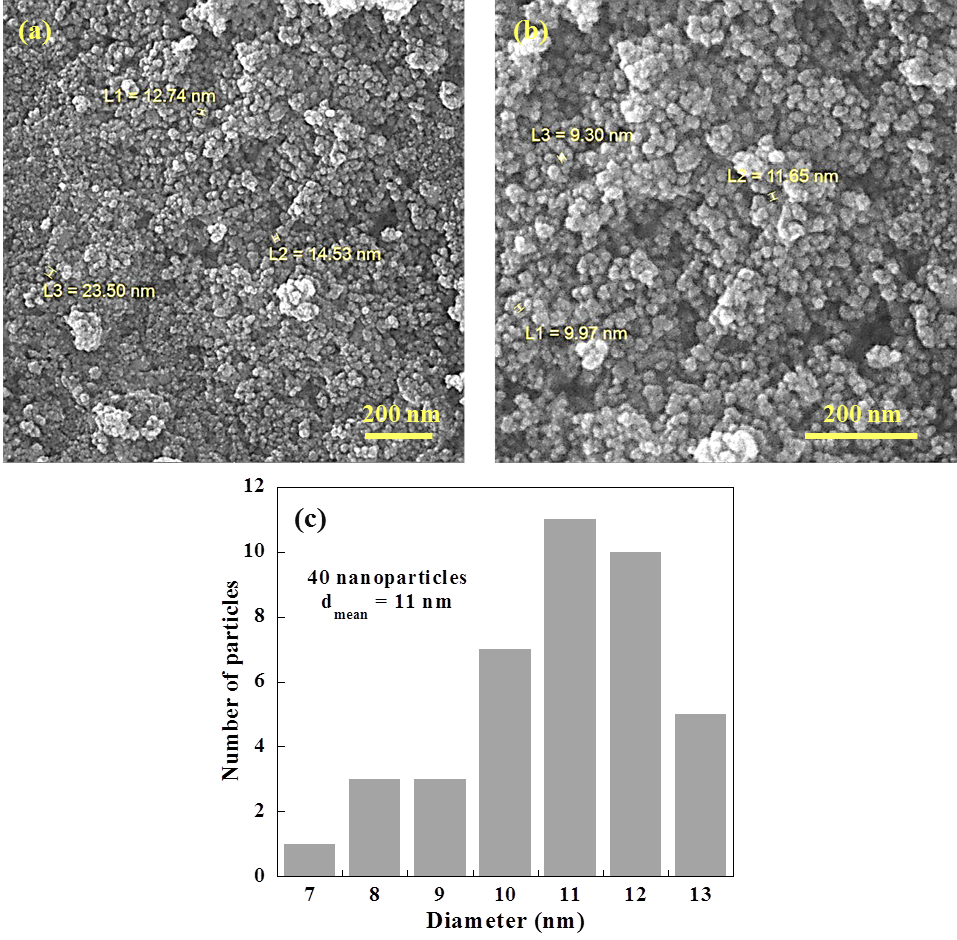


**Figure S6.** (a, b) FE-SEM analysis of synthesized FeCu nanoparticles, and (c) histogram illustrating the particle size distribution.


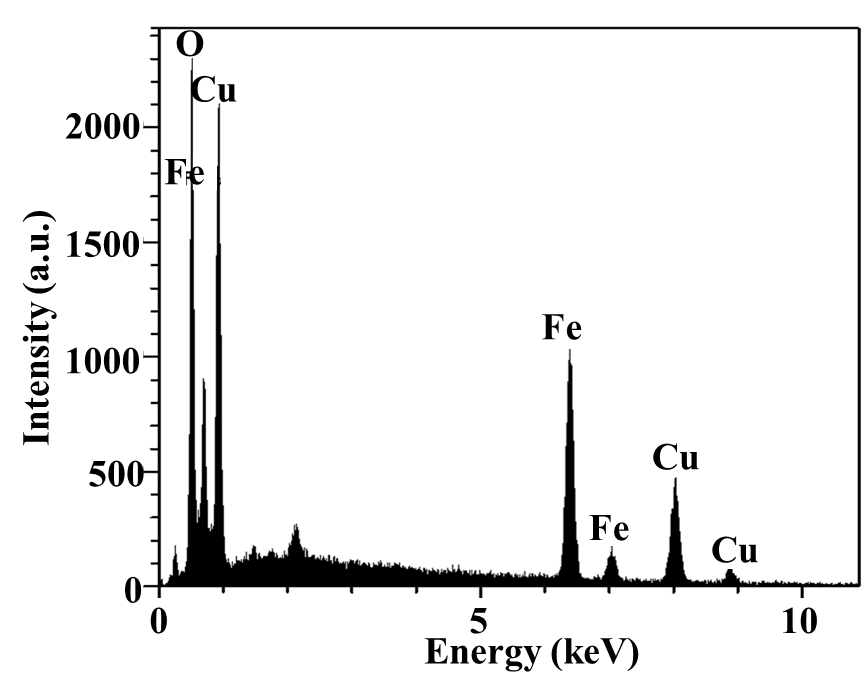


**Figure S7.** EDAX analysis of iron-copper nanoalloy by FE-SEM.


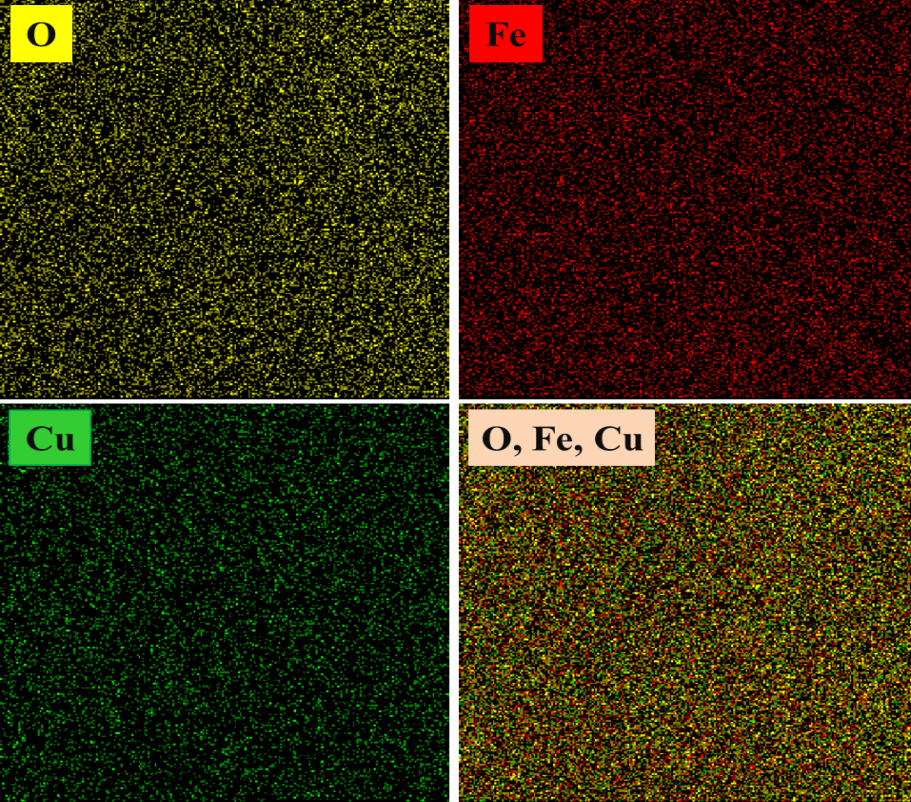


**Figure S8.** Elemental mapping analysis of iron-copper nanoalloy (Fe, Cu, and O elements).


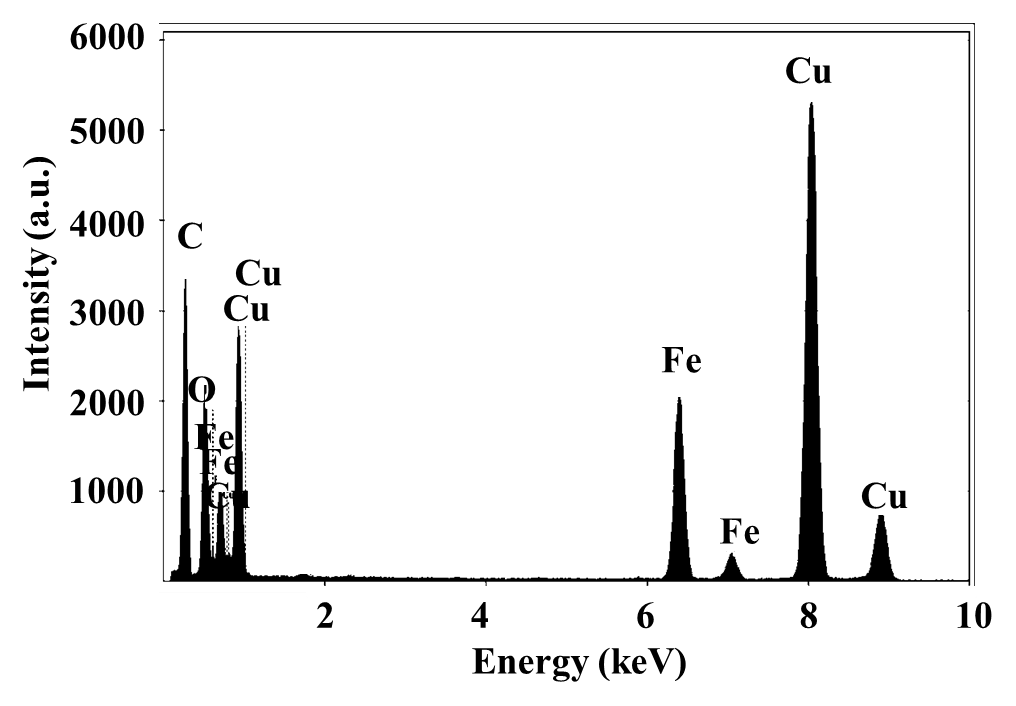


**Figure S9**. EDAX analysis of iron-copper nanoalloy using HR-TEM analysis.
